# Supplementary material
Source: HighWire-hosted journal article supplement (https://jitc.bmj.com/content/10/9/e005151)

Fig. S1

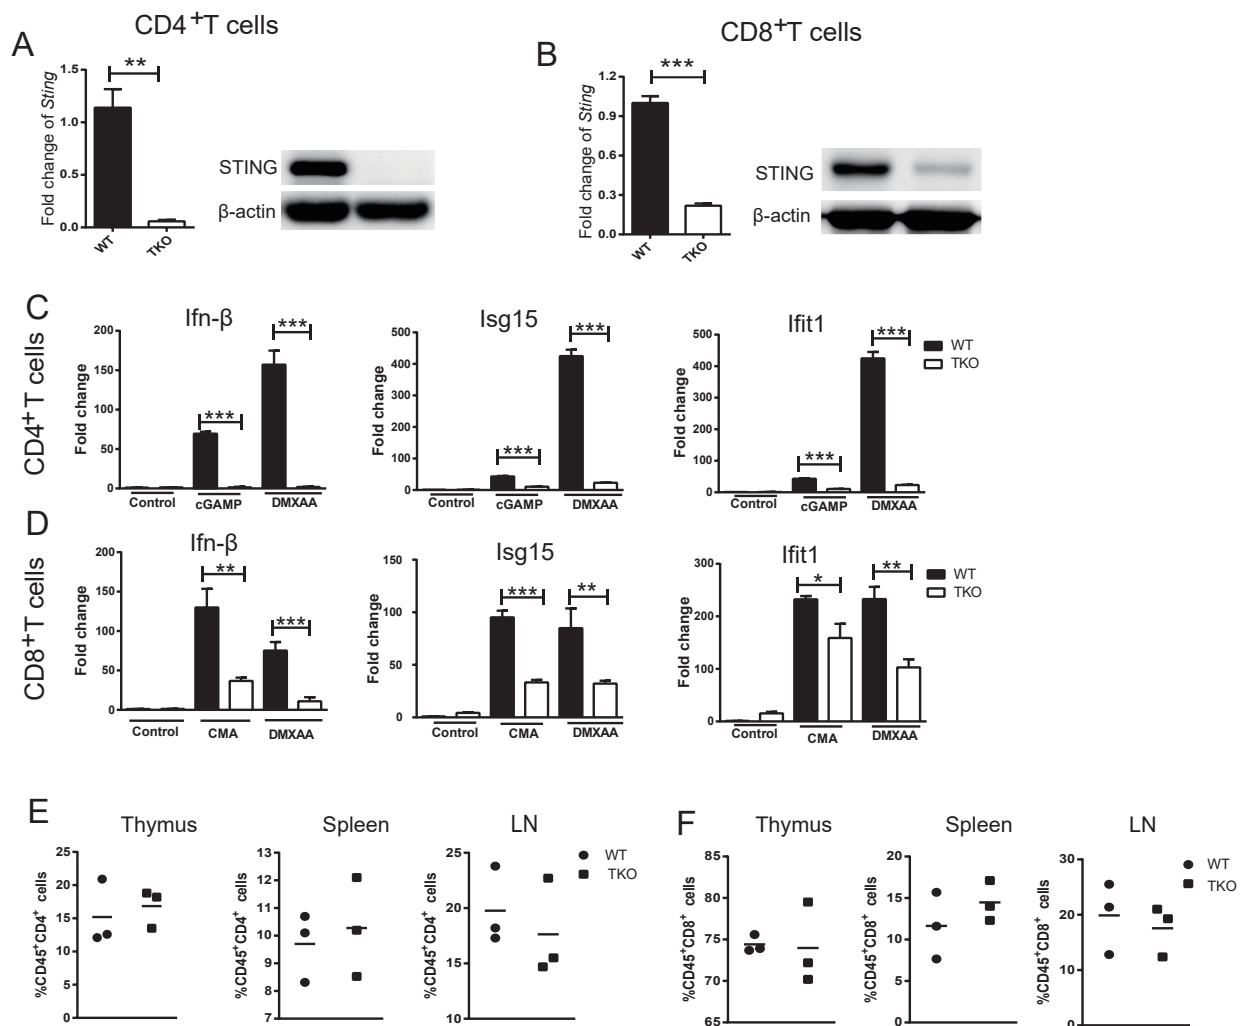

Supplement: inline-supplementary-material-2 [file inline-supplementary-material-2.pdf]

## Fig.S2

A

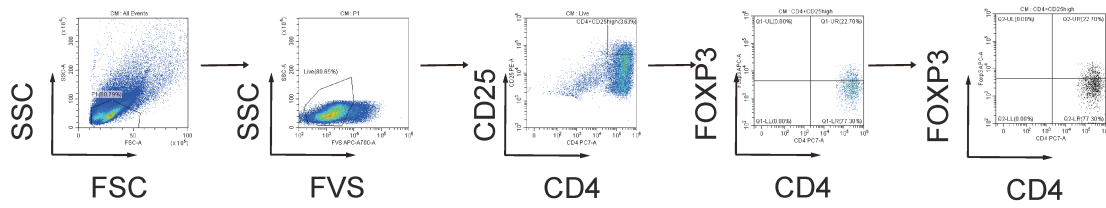

B

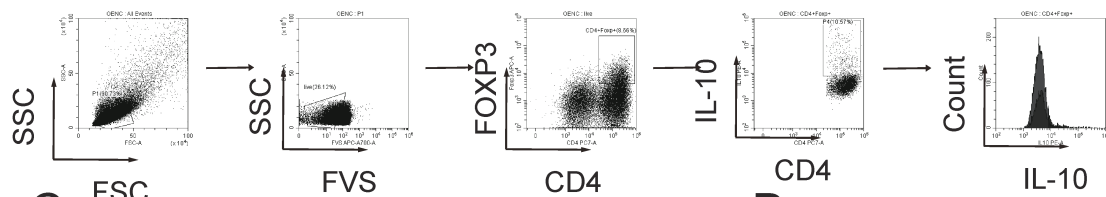

C

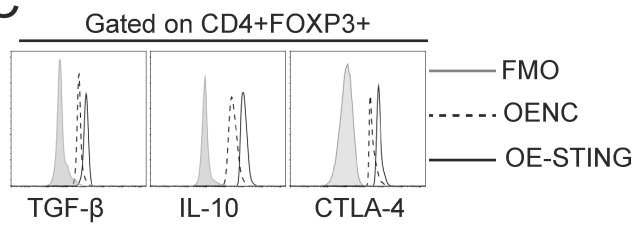

D

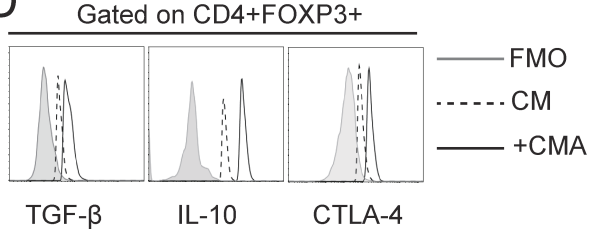

E

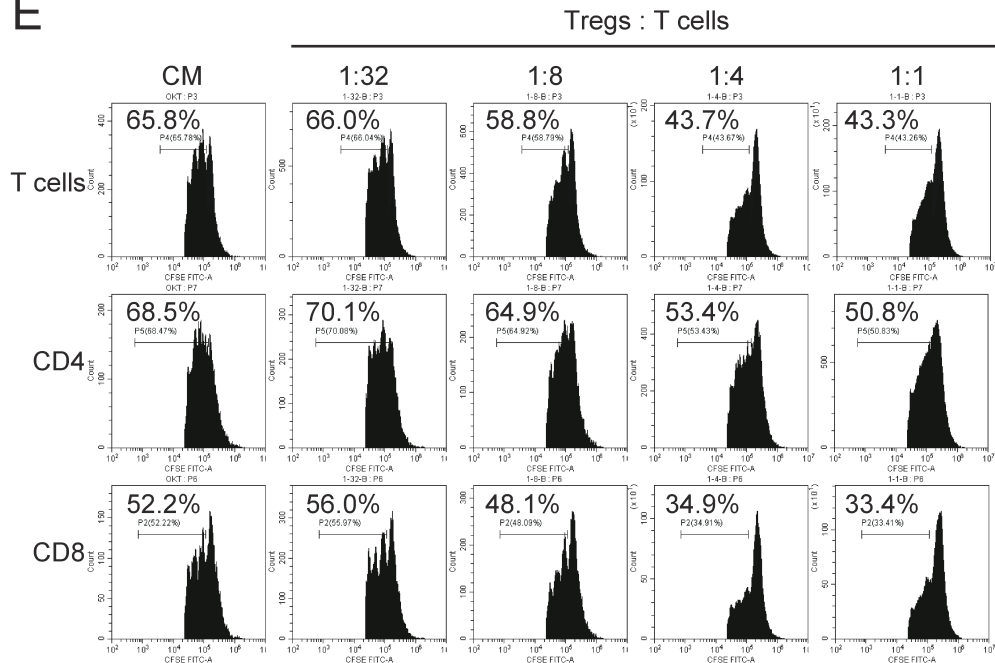

Supplement: inline-supplementary-material-3 [file inline-supplementary-material-3.pdf]
